# Supplementary material for: BNDB – The Biochemical Network Database
Source: Springer Nature journal article supplement (doi:10.1186/1471-2105-8-367), 2007-10-02

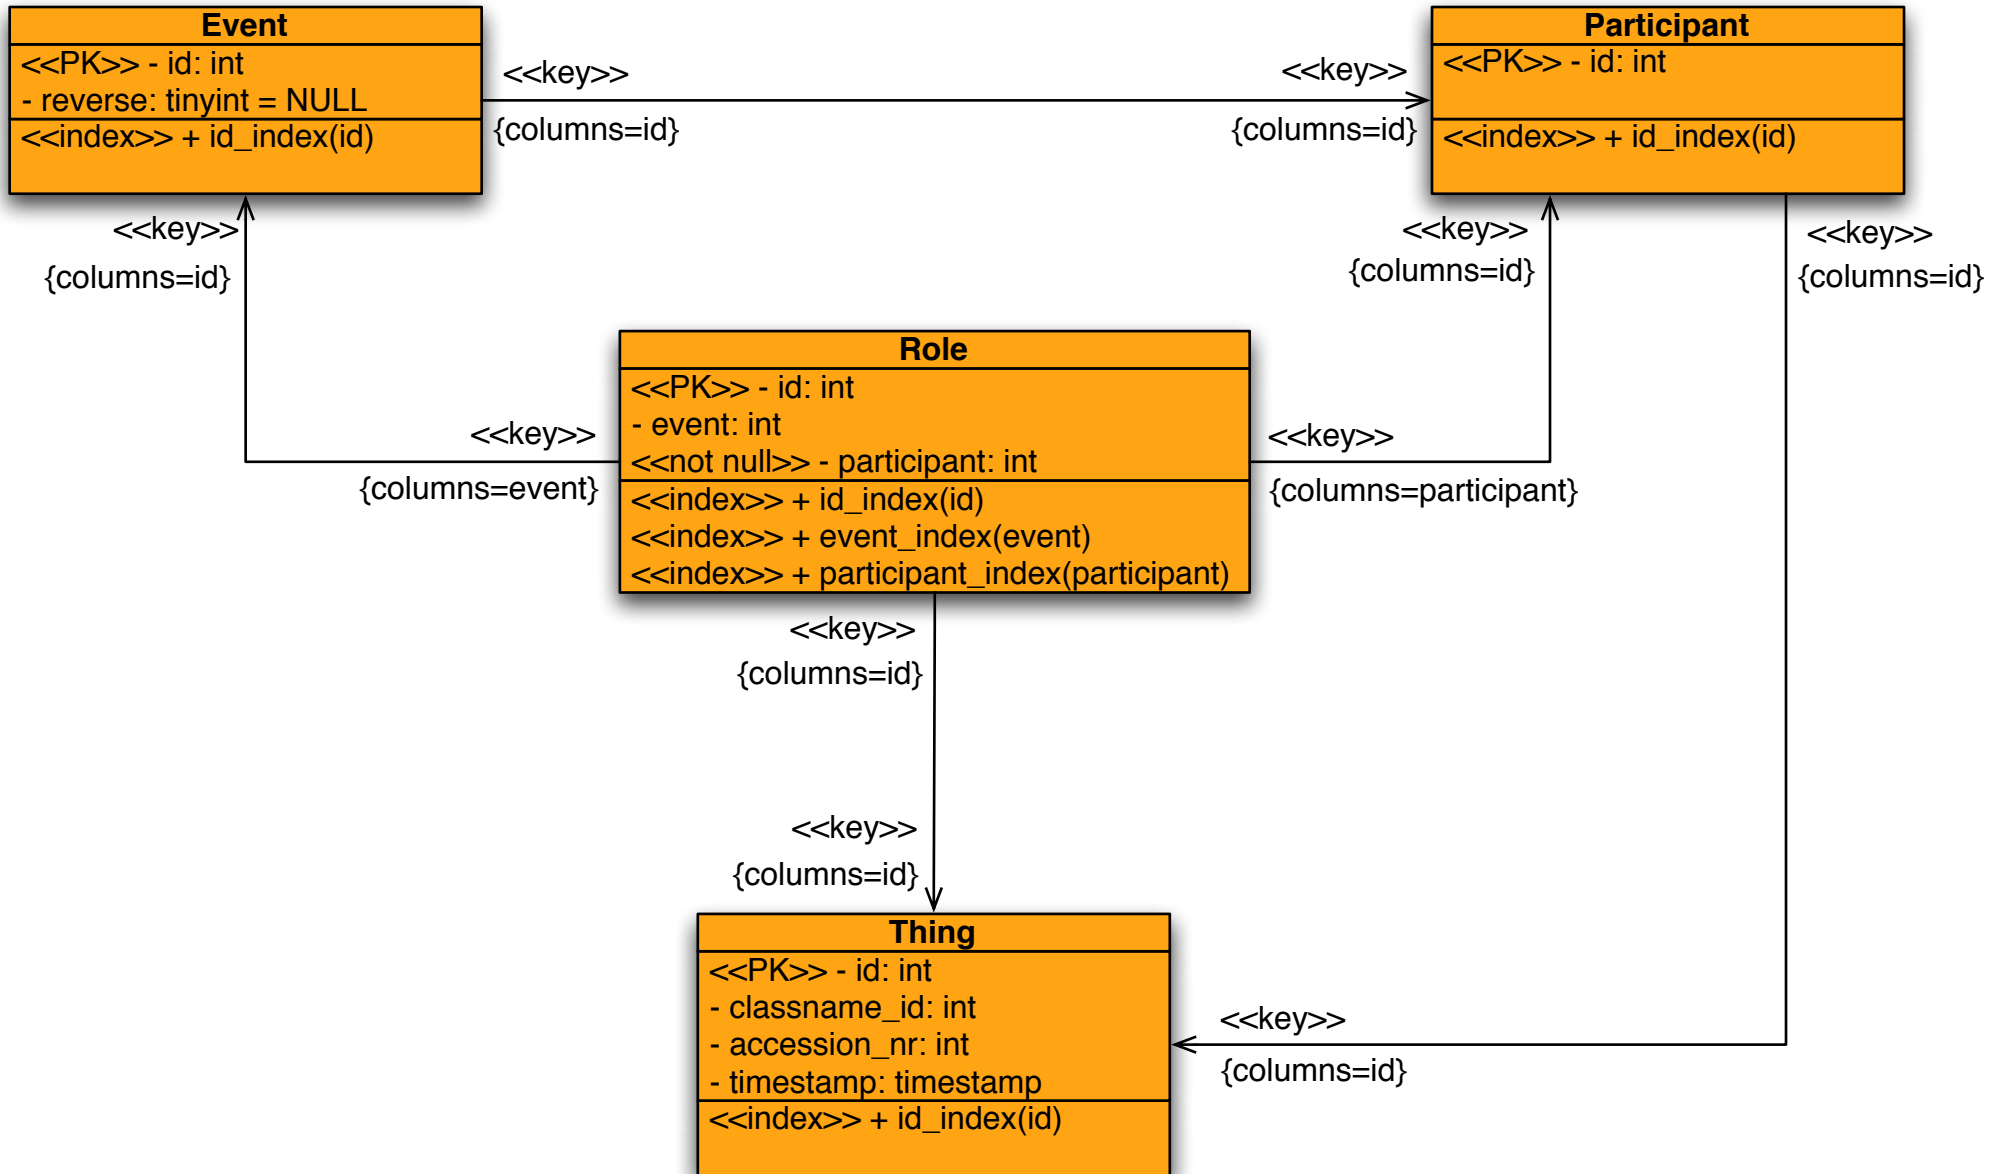

Supplement: 12859_2007_1739_MOESM3_ESM.pdf [file 12859_2007_1739_MOESM3_ESM.pdf]
