# Supplementary material for: BNDB – The Biochemical Network Database
Source: Springer Nature journal article supplement (doi:10.1186/1471-2105-8-367), 2007-10-02
Supplement: 12859_2007_1739_MOESM5_ESM.pdf [file 12859_2007_1739_MOESM5_ESM.pdf]

|                              |
|------------------------------|
| <b>Gene<br/>(BAD)</b>        |
| KEGG: hsa:572<br>GeneID: 572 |

|                                                 |
|-------------------------------------------------|
| <b>Gene<br/>(BCL2-antagonist of cell death)</b> |
| OMIM: 603167<br>GeneID: 572                     |

|                                                   |
|---------------------------------------------------|
| <b>Gene<br/>(BAD)</b>                             |
| GeneID: 572<br>Unigene: Hs.370254<br>GI: 10835069 |

|                                       |
|---------------------------------------|
| <b>Gene</b>                           |
| RefSeqID: NM_004322.2<br>GI: 10835069 |

merge

|                                                                            |
|----------------------------------------------------------------------------|
| <b>Gene<br/>(BAD)</b>                                                      |
| GeneID: 572<br>Unigene: Hs.370254<br>GI: 10835069<br>RefSeqID: NM_004322.2 |

merge

|                                                                                                             |
|-------------------------------------------------------------------------------------------------------------|
| <b>Gene<br/>(BAD)</b><br><b>(BCL2-antagonist of cell death)</b>                                             |
| OMIM: 603167<br>GeneID: 572<br>Unigene: Hs.370254<br>GI: 10835069<br>RefSeqID: NM_004322.2<br>KEGG: hsa:572 |
